# Supplementary material for: Construction of a 9,9′-bifluorenylidene-based small molecule acceptor materials by screening conformation, steric configuration and repeating unit number: a theoretical design and characterization
Source: Royal Society of Chemistry journal article supplement (doi:10.1039/c7tc03496b), 2017-01-01
Supplement: c7tc03496b1.pdf [file c7tc03496b1.pdf]

## Supporting Information

### **Construction of 9, 9'-Bifluorenylidene-based Small Molecule Acceptor Material by Screening Conformation, Steric Configuration and Repeating Unit Number: A Theoretical Design and Characterization**

*Ming-Yue Sui,<sup>a</sup> Yun Geng,<sup>b</sup> Guang-Yan Sun,<sup>a\*</sup> Jian-Ping Wang<sup>c\*</sup>*

<sup>a</sup> Department of Chemistry, Faculty of Science, Yanbian University, Yanji, Jilin, 133002, China. \*E-mail: gysun@ybu.edu.cn

<sup>b</sup> Institute of Functional Material Chemistry, Faculty of Chemistry, Northeast Normal University, Changchun, Jilin, 130024, China.

<sup>c</sup> Shaanxi Key Laboratory of Natural Products & Chemical Biology, College of Chemistry & Pharmacy, Northwest A&F University, Yangling, Shaanxi, 712100, China. \*E-mail: wangjp304@nwsuaf.edu.cn.

## Section S.1. Computational Details of Marcus Rate Parameters

### S.1.1 Reorganization Energy

The total reorganization energy  $\lambda$  includes internal reorganization energy ( $\lambda_{\text{int}}$ ) and external reorganization energy ( $\lambda_{\text{ext}}$ ).<sup>1</sup> The  $\lambda_{\text{int}}$  derive from the changes in the ground-state structures of D and A when they gain or lose charge upon electron transfer, which is expressed as:<sup>2</sup>

$$\lambda_{\text{int}} = \left[ E(A^-) - E(A) \right] + \left[ E(D) - E(D^+) \right] \quad (\text{E.1})$$

where  $E(A^-)$  and  $E(A)$  are the energies of the neutral acceptor A at the anionic and optimal ground-state geometries, respectively.  $E(D^+)$  and  $E(D)$  are the energies of the cation donor D at the neutral and optimal cation geometries, respectively.

However, the  $\lambda_{\text{ext}}$  is due to electronic and nuclear polarization from the surrounding medium, which can be approximately evaluated by:<sup>3</sup>

$$\lambda_{\text{ext}} = \frac{1}{4\pi\epsilon_0} \Delta e^2 \left( \frac{1}{2a_1} + \frac{1}{2a_2} - \frac{1}{R} \right) \left( \frac{1}{\epsilon_{\text{OP}}} - \frac{1}{\epsilon_0} \right) \quad (\text{E.2})$$

where  $a_1$ ,  $a_2$ ,  $R$ ,  $\epsilon_{\text{OP}}$ , and  $\epsilon_0$  are donor radii, acceptor radii, the distance between the center of the donor and acceptor, and optical and the zero-frequency dielectric constants of the surrounding media, respectively. Considering the reconciliation between the computational cost and the accuracy,  $\epsilon_{\text{OP}}$  and  $\epsilon_0$  is estimated to be 1.96 and 5 by Troisi<sup>4</sup> and Jérôme<sup>1</sup>, respectively.

### S.1.2 Electronic Coupling

For the calculation of inter-CT and inter-CR rates, the electronic coupling can be approximated from the generalized Mulliken-Hush (GMH) formalism<sup>5,6</sup> in adiabatic description, which could be written as below:

$$V_{\text{DA}} = \frac{\mu_{\text{tr}} \Delta E}{\sqrt{(\Delta\mu)^2 + 4(\mu_{\text{tr}})^2}} \quad (\text{E.3})$$

where  $\mu_{tr}$  is the average transition dipole moment,  $\Delta\mu$  is the dipole moment difference between initial state  $S_0$  and final state  $S_n$ , and  $\Delta E$  corresponds to the vertical excitation energy. The  $\Delta\mu$  can be estimated directly from a finite field method on the excitation energy.<sup>2</sup>

### S.1.3 Gibbs Free Energy

In the interface charge transfer processes, Gibbs free energy change of charge recombination ( $\Delta G_{inter-CR}$ ) can be expressed under the equation:<sup>7</sup>

$$\Delta G_{CR} = E_{IP}(D) - E_{EA}(A) \quad (E.4)$$

where  $E_{IP}(D)$  is the ionization potential of the donor which could be estimated by the HOMO energy of the donor, and  $E_{EA}(A)$  is the electron affinity of the acceptor which is considered to be the LUMO energy of the acceptor here.<sup>8</sup>

The Gibbs free energy change of exciton dissociation ( $\Delta G_{inter-CS}$ ), can be evaluated by the Rehm-Weller equation:<sup>7</sup>

$$\Delta G_{CS} = -\Delta G_{CR} - \Delta E_{0-0} - E_B \quad (E.5)$$

Where  $\Delta E_{0-0}$  is the lowest excited state energy of free-base donor and  $E_B$  is the exciton binding energy, defined as the energy difference between the electronic and optical band-gap energy.<sup>9</sup>

### Tables:

**Table S1.** Calculated and experimental bond lengths (in Å), bond angles (in deg) and torsion angles (in deg) of the configuration **c** for 99'BF at  $S_0$  state (B3LYP/6-31G(d)).

| <b>c</b> |                 |                   |                  |       |                   |
|----------|-----------------|-------------------|------------------|-------|-------------------|
|          | Cal.            | Exp. <sup>a</sup> |                  | Cal.  | Exp. <sup>a</sup> |
|          | Bond Length (Å) |                   | Bond Angle (deg) |       |                   |
| R(1,10)  | 1.400           | 1.397             | A(10,9,13)       | 105.4 | 104.9             |
| R(1,2)   | 1.397           | 1.399             | A(9,10,11)       | 109.0 | 109.1             |

|          |       |       |                     |       |       |
|----------|-------|-------|---------------------|-------|-------|
| R(2,3)   | 1.399 | 1.371 | A(10,11,12)         | 108.3 | 108.4 |
| R(3,4)   | 1.397 | 1.373 | Torsion Angle (deg) |       |       |
| R(4,11)  | 1.393 | 1.394 | DA(10,9,9',10')     | 34.0  | 34.0  |
| R(9,10)  | 1.482 | 1.476 |                     |       |       |
| R(10,11) | 1.419 | 1.400 |                     |       |       |
| R(11,12) | 1.463 | 1.454 |                     |       |       |
| R(9,9')  | 1.381 | 1.367 |                     |       |       |

a) Abbreviations: R = bond length, A = bond angle, DA = torsion angle.

<sup>a</sup> Data from reference [22, 68].

**Table S2.** Calculated The FMO energy level (eV) for the P3HT (n=6) derivatives at the B3LYP/6-31G(d) level.

| n=6   | <b>6T:</b> 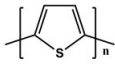 | <b>P3HT(-CH3):</b>  | <b>P3HT(-OCH3):</b>  |
|-------|----------------------------------------------------------------------------------------------|------------------------------------------------------------------------------------------------------|---------------------------------------------------------------------------------------------------------|
| HOMO  | -4.82                                                                                        | -4.98                                                                                                | -4.12                                                                                                   |
| LUMO  | -2.15                                                                                        | -1.67                                                                                                | -1.77                                                                                                   |
| $E_g$ | 2.67                                                                                         | 3.31                                                                                                 | 2.35                                                                                                    |

**Table S3.** Calculated bond lengths (in Å), bond angles (in deg) and torsion angles (in deg) of the configuration **p** for 99'BF at  $S_0$  state (B3LYP/6-31G(d)).

| <b>p</b> |                 |                     |                  |  |
|----------|-----------------|---------------------|------------------|--|
|          | Bond Length (Å) |                     | Bond Angle (deg) |  |
| R(1,10)  | 1.398           | A(10,9,13)          | 103.60           |  |
| R(1,2)   | 1.399           | A(9,10,11)          | 108.50           |  |
| R(2,3)   | 1.397           | A(10,11,12)         | 108.30           |  |
| R(3,4)   | 1.397           | Torsion Angle (deg) |                  |  |
| R(4,11)  | 1.393           | DA(10,9,9',10')     | -9.51            |  |
| R(9,10)  | 1.497           |                     |                  |  |
| R(10,11) | 1.418           |                     |                  |  |
| R(11,12) | 1.464           |                     |                  |  |
| R(9,9')  | 1.375           |                     |                  |  |

**Table S4.** Calculated maximum absorption peaks  $\lambda_{\max}$  (nm), oscillator strengths  $f$  and major configurations of the **p** derivatives at the TD-B3LYP/6-31G(d) level.

|           | states | $\lambda_{\max}$ | $f$   | composition |              |
|-----------|--------|------------------|-------|-------------|--------------|
| <b>p2</b> | $S_1$  | 466.7            | 0.695 | H→L (85%)   | H-2→L (9%)   |
|           | $S_5$  | 424.5            | 0.481 | H-4→L (15%) | H-2→L (53%)  |
| <b>p3</b> | $S_2$  | 467.1            | 1.046 | H→L (90%)   | H-1→L+1 (3%) |

|            |       |       |       |               |               |
|------------|-------|-------|-------|---------------|---------------|
|            | $S_9$ | 415.8 | 0.435 | H-1→L+1 (47%) | H-1→L+2 (7%)  |
| <b>p4</b>  | $S_1$ | 501.1 | 1.613 | H→L (92%)     |               |
| <b>p5</b>  | $S_1$ | 513.8 | 1.990 | H→L (96%)     |               |
| <b>p33</b> | $S_1$ | 490.4 | 1.492 | H→L (90%)     | H-1→L+1 (3%)  |
|            | $S_7$ | 432.2 | 0.341 | H-6→L (33%)   | H-4→L (23%)   |
| <b>p44</b> | $S_1$ | 503.9 | 2.244 | H→L (88%)     | H-1→L+1 (6%)  |
| <b>p55</b> | $S_1$ | 511.2 | 2.942 | H→L (82%)     | H-1→L+1 (10%) |

**Table S5.** Computed internal reorganization energy  $\lambda_{\text{int}}$  (eV), external reorganization energy  $\lambda_{\text{ext}}$  (eV), total reorganization energy  $\lambda$  (eV), gibbs free energy change  $\Delta G$  (eV) and electronic coupling  $V_{\text{DA}}$  (eV) of D/p**2-p55** at the TD-CAM-B3LYP/6-31G(d)//B3LYP/6-31G(d) level.

|               | $\lambda_{\text{int}}$ | $\lambda_{\text{ext}}$ | $\lambda$ | $V_{\text{DA}}$ | $\Delta G_{\text{CS}}$ | $\Delta G_{\text{CR}}$ |
|---------------|------------------------|------------------------|-----------|-----------------|------------------------|------------------------|
| D/c <b>2</b>  | 0.27                   | 0.21                   | 0.47      | 5.61            | -0.91                  | -1.44                  |
| D/c <b>3</b>  | 0.23                   | 0.19                   | 0.42      | 4.68            | -0.97                  | -1.38                  |
| D/c <b>4</b>  | 0.23                   | 0.17                   | 0.40      | 3.87            | -1.04                  | -1.31                  |
| D/c <b>5</b>  | 0.23                   | 0.17                   | 0.40      | 3.34            | -1.09                  | -1.26                  |
| D/c <b>33</b> | 0.23                   | 0.17                   | 0.40      | 2.29            | -0.99                  | -1.36                  |
| D/c <b>44</b> | 0.22                   | 0.15                   | 0.37      | 5.01            | -1.02                  | -1.33                  |
| D/c <b>55</b> | 0.20                   | 0.15                   | 0.35      | 4.56            | -1.05                  | -1.30                  |
| D/p <b>2</b>  | 0.27                   | 0.21                   | 0.48      | 7.63            | -1.76                  | -0.59                  |
| D/p <b>3</b>  | 0.23                   | 0.19                   | 0.42      | 2.65            | -1.68                  | -0.67                  |
| D/p <b>4</b>  | 0.23                   | 0.17                   | 0.40      | 3.87            | -1.61                  | -0.74                  |
| D/p <b>5</b>  | 0.23                   | 0.17                   | 0.40      | 5.22            | -1.56                  | -0.79                  |
| D/p <b>33</b> | 0.24                   | 0.17                   | 0.41      | 2.18            | -1.68                  | -0.67                  |
| D/p <b>44</b> | 0.22                   | 0.15                   | 0.37      | 1.39            | -1.63                  | -0.72                  |
| D/p <b>55</b> | 0.20                   | 0.15                   | 0.35      | 3.97            | -1.61                  | -0.74                  |

**Figures:**

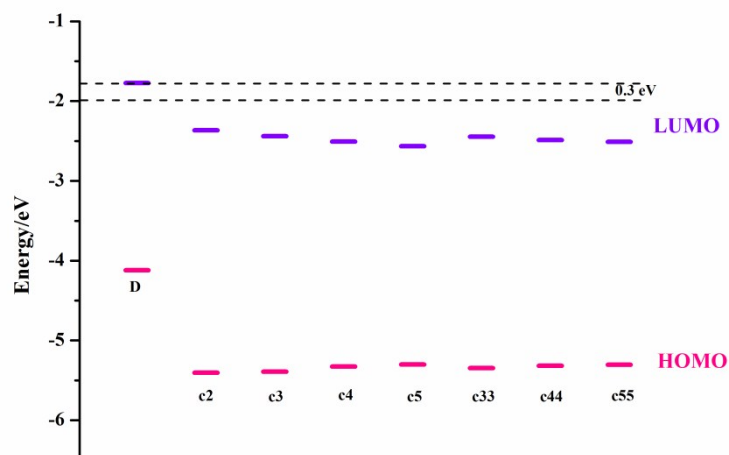

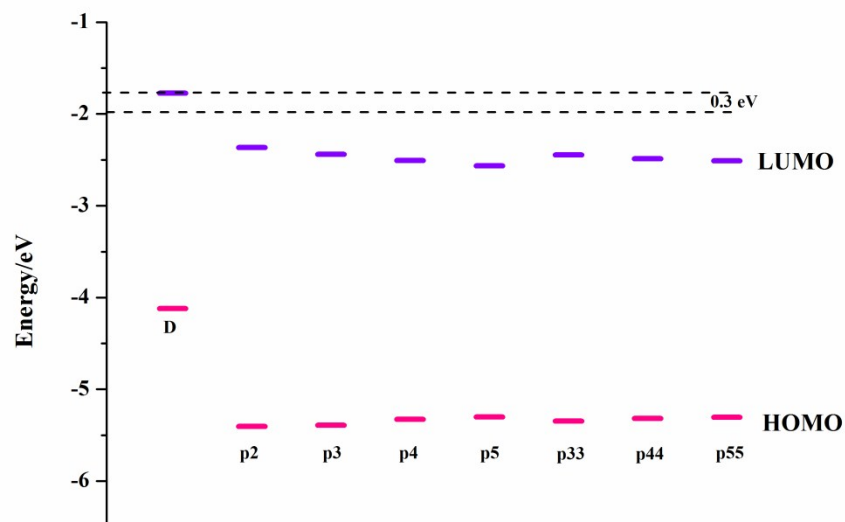

**Figure S1.** Illustration of FMO energy levels for the studied compounds and donor (D) evaluated at the B3LYP/6-31G(d) and TD-B3LYP/6-31G(d) levels.

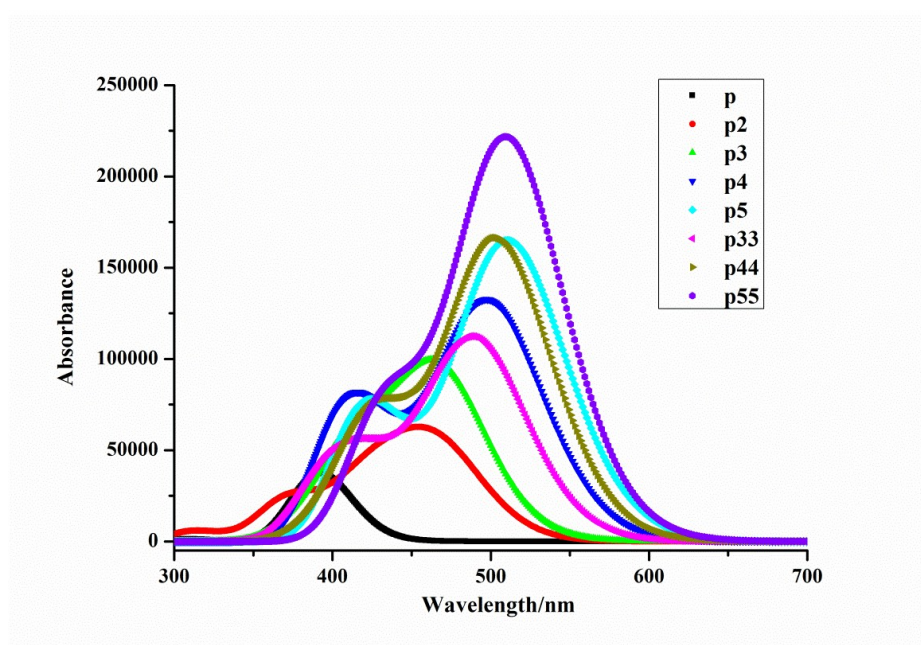

**Figure S2.** Simulated absorption spectra of the **p** derivatives at the TD-B3LYP/6-31G(d) level.

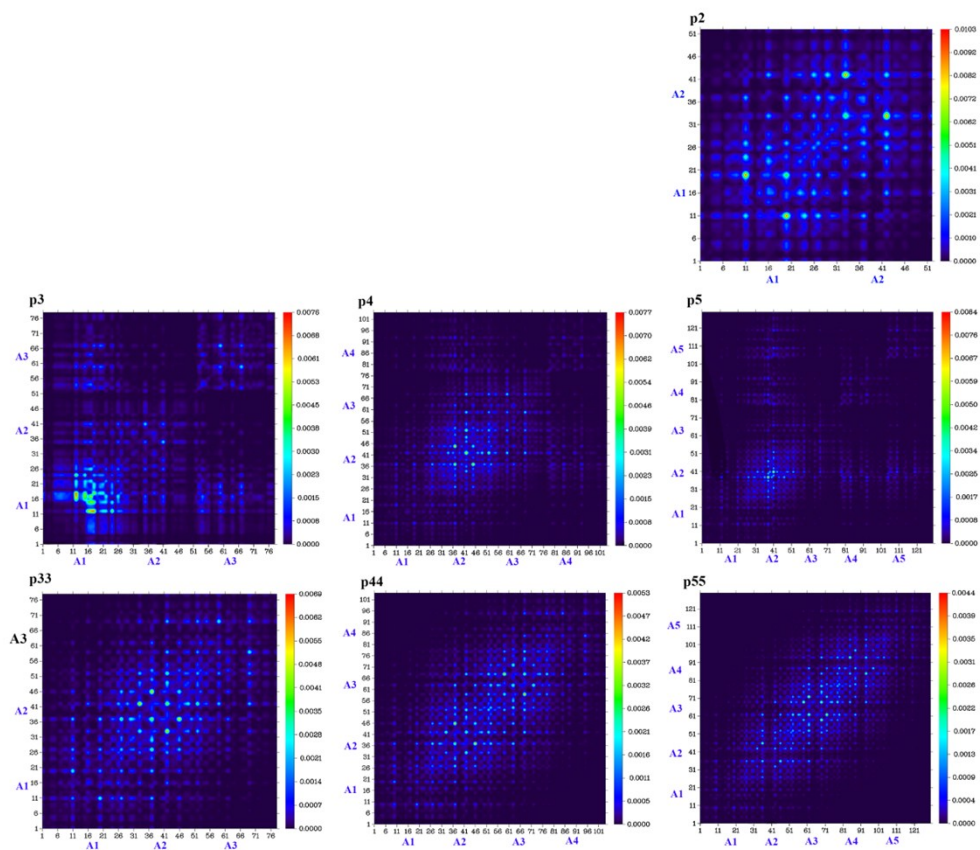

**Figure S3.** Simulated transition density matrix (TDM) associated with the lowest excited states of p2-p55 (the hydrogen atoms of all systems are omitted), and the color bars are given on the right.

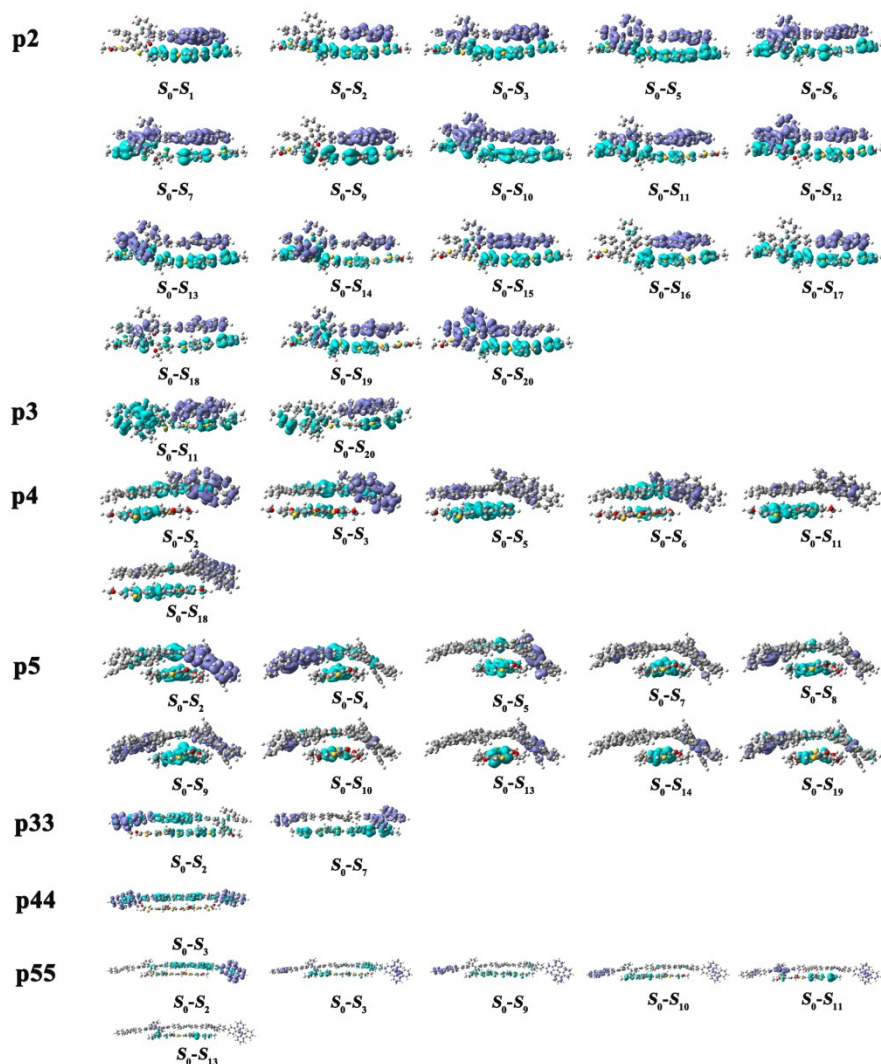

**Figure S4.** Charge density difference maps of inter-CT excited states for D/p2-p55 heterojunctions at the TD-CAM-B3LYP/6-31G(d)//B3LYP/6-31G(d) level, where the violet and turquoise colors stand for the increase and decrease in electron density, respectively.

#### References:

- 1 Lemaur, V.; Steel, M.; Beljonne, D.; Brédas, J. L.; Cornil, J., *J. Am. Chem. Soc.* **2005**, *127*, 6077-6086.
- 2 Li, Y.; Pullerits, T.; Zhao, M.; Sun, M., *J. Phys. Chem. C* **2011**, *115*, 21865-21873.
- 3 Marcus, R. A., *J. Chem. Phys.* **1956**, *24*, 966-978.
- 4 Liu, T.; Troisi, A., *J. Phys. Chem. C* **2011**, *115*, 2406-2415.



- 5 Voityuk, A. A., *J. Chem. Phys.* **2006**, *124*, 064505.
- 6 Hsu, C.-P., *Acc. Chem. Res.* **2009**, *42*, 509-518.
- 7 Kavarnos, G. J.; Turro, N. J., *Chem. Rev.* **1986**, *86*, 401-449.
- 8 Zhang, X.; Chi, L.; Ji, S.; Wu, Y.; Song, P.; Han, K.; Guo, H.; James, T. D.;  
Zhao, J., *J. Am. Chem. Soc.* **2009**, *131*, 17452-17463.
- 9 Scholes, G. D.; Rumbles, G., *Nat. Mater.* **2006**, *5*, 683-696.
